# Supplementary material for: Preferential antitumor effect of the Src inhibitor dasatinib associated with a decreased proportion of aldehyde dehydrogenase 1-positive cells in breast cancer cells of the basal B subtype
Source: BMC Cancer. 2010 Oct 20;10:568. doi: 10.1186/1471-2407-10-568 (PMC2967550; doi:10.1186/1471-2407-10-568)
Supplement: Additional file 1 — Table 1. Biological characteristics of breast cancer cell lines [file 1471-2407-10-568-S1.XLS]

## Sheet: Sheet1
Table 1 Biological characteristics of breast cancer cell lines
Variables/Cell lines	KPL-3C	KPL-1	BT-474	KPL-4	MDA-MB-231	MDA-MB-157	HCC1937
Intrinsic subtype	Luminal A	Luminal A	Luminal B	HER2+ER-	Basal B	Basal B	Basal A
ER*	positive	positive	positive	negative	negative	negative	negative
PR*	negative	negative	positive	negative	negative	negative	negative
HER2*	negative	negative	positive	positive	negative	negative	negative
HER1*	negative	negative	negative	negative	positive	positive	positive
CK5/6*	positive	positive	positive	positive	positive	positive	positive
Vimentin*	negative	negative	positive	negative	positive	positive	negative
BRCA1*	positive	negative	negative	positive	negative	negative	negative
P53*	negative	positive	positive	negative	positive	negative	negative
c-Src**	2	2	3	2	3	3	2
p-Src (Tyr527)**	2	2	3	2	3	2	2
p-Src (Tyr416)**	0	1	2	2	3	3	3
*Evaluated by immunocytochemistry. The cut-off value was 10% for each variable.
**Evaluated by immunocytochemistry according to the Hercep Test criteria [31].
