# Supplementary material for: Preferential antitumor effect of the Src inhibitor dasatinib associated with a decreased proportion of aldehyde dehydrogenase 1-positive cells in breast cancer cells of the basal B subtype
Source: BMC Cancer. 2010 Oct 20;10:568. doi: 10.1186/1471-2407-10-568 (PMC2967550; doi:10.1186/1471-2407-10-568)
Supplement: Additional file 2 — Table 2. The 50% growth inhibitory concentrations of dasatinib or chemotherapeutic agents in breast cancer cell lines [file 1471-2407-10-568-S2.XLS]

## Sheet: Sheet1
Table 2 The 50% growth inhibitory concentrations of dasatinib or chemotherapeutic agents in breast cancer cell lines
Agents/Cell lines	KPL-3C	KPL-1	BT-474	KPL-4	MDA-MB-231	MDA-MB-157	HCC1937
Dasatinib	5.0*	5	7.5	5	0.15	0.1	> 10
Etoposide	0.5	2	2	1.2	0.25	0.15	0.5
Doxorubicin	0.05	0.15	0.15	0.06	0.006	0.02	0.08
Paclitaxel	0.03	0.02	0.007	0.007	0.006	0.002	0.015
5-FU	> 20	10	> 20	2	7.5	10	5
Cisplatin	> 3.3	0.75	> 3.3	1	0.6	0.5	1
Carboplatin	> 6.6	2.5	> 6.6	> 6.6	2.5	2	1
SN38	0.01	0.002	0.01	0.2	0.0015	0.003	0.01
*The mean of the 50% growth inhibitory concentration (μM) of each agent. The coefficients of variations were less than 20% in respective agents.
