# Supplementary material for: Preferential antitumor effect of the Src inhibitor dasatinib associated with a decreased proportion of aldehyde dehydrogenase 1-positive cells in breast cancer cells of the basal B subtype
Source: BMC Cancer. 2010 Oct 20;10:568. doi: 10.1186/1471-2407-10-568 (PMC2967550; doi:10.1186/1471-2407-10-568)
Supplement: Additional file 3 — Table 3. Proportion of breast cancer stem cells measured by immunocytochemistry and Aldefluor assay [file 1471-2407-10-568-S3.XLS]

## Sheet: Sheet1
Table 3 Proportion of breast cancer stem cells measured by immunocytochemistry and Aldefluor assay
Methods/Cell lines	KPL-3C	KPL-1	BT-474	KPL-4	MDA-MB-231	MDA-MB-157	HCC1937
Immunocytochemistry	< 1%	< 1%	16.7±3.0%*	1	13.0±2.0%	14.1±3.2%	12.0±2.0%
Aldefluor assay	ND**	ND	26.1±0.7%	25.1±0.6%	5.4±0.2%	5.8±0.1%	ND
*Mean±SE (n = 2 or 3)
**Not done
